# Supplementary material for: The Yeast Sks1p Kinase Signaling Network Regulates Pseudohyphal Growth and Glucose Response
Source: PubMed Central journal article supplement (PMC3945295; doi:10.1371/journal.pgen.1004183), 2014-03-06
Supplement: pgen.1004183.s003.pdf [file pgen.1004183.s003.pdf]

**Table S1.** Strains used in this study

| Strain | Genotype                                                                                      | Source                   |
|--------|-----------------------------------------------------------------------------------------------|--------------------------|
| Y825   | <i>ura3-52 leu2_0 MATa</i>                                                                    | M. Snyder (Stanford, CA) |
| HLY337 | <i>ura3-52 trp1-1 MATα</i>                                                                    | G. Fink (MIT, MA)        |
| yCK021 | <i>ura3-52/ura3-52 leu2_0/LEU2 TRP1/trp1-1<br/>MATa/MATα</i>                                  | This study               |
| yCK009 | <i>_rgt1::KanMX6/_rg11::KanMX6 ura3-52/ura3-52<br/>leu2_0/LEU2 TRP1/trp1-1 MATa/MATα</i>      | This study               |
| yCK017 | <i>_itr1::KanMX6/_itr1::KanMX6 ura3-52/ura3-52<br/>leu2_0/LEU2 TRP1/trp1-1 MATa/MATα</i>      | This study               |
| yCK036 | <i>_hxt1::KanMX6/_hxt1::KanMX6 ura3-52/ura3-52<br/>leu2_0/LEU2 TRP1/trp1-1 MATa/MATα</i>      | This study               |
| yCK037 | <i>_lrg1::KanMX6/_lrg1::KanMX6 ura3-52/ura3-52<br/>leu2_0/LEU2 TRP1/trp1-1 MATa/MATα</i>      | This study               |
| yCK038 | <i>_npr3::KanMX6/_npr3::KanMX6 ura3-52/ura3-52<br/>leu2_0/LEU2 TRP1/trp1-1 MATa/MATα</i>      | This study               |
| yCK039 | <i>_pdr5::KanMX6/_pdr5::KanMX6 ura3-52/ura3-52<br/>leu2_0/LEU2 TRP1/trp1-1 MATa/MATα</i>      | This study               |
| yCK040 | <i>_rbs1::KanMX6/_rbs1::KanMX6 ura3-52/ura3-52<br/>leu2_0/LEU2 TRP1/trp1-1 MATa/MATα</i>      | This study               |
| yCK041 | <i>_rck2::KanMX6/_rck2::KanMX6 ura3-52/ura3-52<br/>leu2_0/LEU2 TRP1/trp1-1 MATa/MATα</i>      | This study               |
| yCK042 | <i>_tpo4::KanMX6/_tpo4::KanMX6 ura3-52/ura3-52<br/>leu2_0/LEU2 TRP1/trp1-1 MATa/MATα</i>      | This study               |
| yCK098 | <i>_gpr1::KanMX6/_gpr1::KanMX6 ura3-52/ura3-52<br/>leu2_0/LEU2 TRP1/trp1-1 MATa/MATα</i>      | This study               |
| yCK100 | <i>_prb1::KanMX6/_prb1::KanMX6 ura3-52/ura3-52<br/>leu2_0/LEU2 TRP1/trp1-1 MATa/MATα</i>      | This study               |
| yCK108 | <i>_bud6::KanMX6/_bud6::KanMX6 ura3-52/ura3-52<br/>leu2_0/LEU2 TRP1/trp1-1 MATa/MATα</i>      | This study               |
| yCK110 | <i>_scp160::KanMX6/_scp160::KanMX6 ura3-52/ura3-<br/>52 leu2_0/LEU2 TRP1/trp1-1 MATa/MATα</i> | This study               |

|        |                                                                                                            |            |
|--------|------------------------------------------------------------------------------------------------------------|------------|
| yCK112 | <i>_sks1::KanMX6/_sks1::KanMX6 ura3-52/ura3-52<br/>leu2_0/LEU2 TRP1/trp1-1 MATa/MAT<math>\alpha</math></i> | This study |
| yCK118 | <i>_ptr2::KanMX6/_ptr2::KanMX6 ura3-52/ura3-52<br/>leu2_0/LEU2 TRP1/trp1-1 MATa/MAT<math>\alpha</math></i> | This study |
| yCK124 | <i>_mds3::KanMX6/_mds3::KanMX6 ura3-52/ura3-52<br/>leu2_0/LEU2 TRP1/trp1-1 MATa/MAT<math>\alpha</math></i> | This study |
| yCK151 | <i>_pda1::KanMX6/_pda1::KanMX6 ura3-52/ura3-52<br/>leu2_0/LEU2 TRP1/trp1-1 MATa/MAT<math>\alpha</math></i> | This study |
| yCK169 | <i>_mga1::KanMX6/_mga1::KanMX6 ura3-52/ura3-52<br/>leu2_0/LEU2 TRP1/trp1-1 MATa/MAT<math>\alpha</math></i> | This study |
| yCK170 | <i>_phd1::KanMX6/_phd1::KanMX6 ura3-52/ura3-52<br/>leu2_0/LEU2 TRP1/trp1-1 MATa/MAT<math>\alpha</math></i> | This study |
| yCK172 | <i>_tec1::KanMX6/_tec1::KanMX6 ura3-52/ura3-52<br/>leu2_0/LEU2 TRP1/trp1-1 MATa/MAT<math>\alpha</math></i> | This study |
| yCK189 | <i>NPR3-S486A/NPR3-S486A ura3-52/ura3-52<br/>leu2_0/LEU2 TRP1/trp1-1 MATa/MATA</i>                         | This study |
| yCK236 | <i>_mfg1::KanMX6/_mfg1::KanMX6 ura3-52/ura3-52<br/>leu2_0/LEU2 TRP1/trp1-1 MATa/MATA</i>                   | This study |
| yCK237 | <i>_mss11::KanMX6/_mss11::KanMX6 ura3-52/ura3-52<br/>leu2_0/LEU2 TRP1/trp1-1 MATa/MATA</i>                 | This study |
| CS337  | <i>_tpk2::KanMX6/_tpk2::KanMX6 ura3-52/ura3-52<br/>leu2_0/LEU2 TRP1/trp1-1 MATa/MATA</i>                   | This study |
| CS343  | <i>_ras2::KanMX6/_ras2::KanMX6 ura3-52/ura3-52<br/>leu2_0/LEU2 TRP1/trp1-1 MATa/MATA</i>                   | This study |
| yCK263 | <i>PDA1-S313A/PDA1-S313A ura3-52/ura3-52<br/>leu2_0/LEU2 TRP1/trp1-1 MATa/MATA</i>                         | This study |
| yCK264 | <i>PDA1-Y309A/PDA1-Y309A ura3-52/ura3-52<br/>leu2_0/LEU2 TRP1/trp1-1 MATa/MATA</i>                         | This study |
| yCK274 | <i>ITR1-S26A/ITR1-S26A ura3-52/ura3-52<br/>leu2_0/LEU2 TRP1/trp1-1 MATa/MATA</i>                           | This study |
| yCK275 | <i>SKS1-K39R/SKS1-K39R ura3-52/ura3-52<br/>leu2_0/LEU2 TRP1/trp1-1 MATa/MATA</i>                           | This study |
| yCK283 | <i>LRG1-S605A/LRG1-S605A ura3-52/ura3-52</i>                                                               | This study |

|        |                                                                                                  |                 |
|--------|--------------------------------------------------------------------------------------------------|-----------------|
|        | <i>leu2_0/LEU2 TRP1/trp1-1 MATa/MATA</i>                                                         |                 |
| yCK284 | <i>PDA1-Y309A-S313A/PDA1-Y309A-S313A ura3-52/ura3-52 leu2_0/LEU2 TRP1/trp1-1 MATa/MATA</i>       | This study      |
| yCK293 | <i>BUD6-S347A/BUD6-S347A ura3-52/ura3-52 leu2_0/LEU2 TRP1/trp1-1 MATa/MATA</i>                   | This study      |
| yCK300 | <i>PDA1-3HA-KanMX6 ura3-52 leu2_0 MATa</i>                                                       | This study      |
| yCK302 | <i>PDA1-Y309A-3HA-KanMX6 ura3-52 leu2_0 MATa</i>                                                 | This study      |
| yCK304 | <i>PDA1-S313A-3HA-KanMX6 ura3-52 leu2_0 MATa</i>                                                 | This study      |
| yCK306 | <i>PDA1-Y309A-S313A-3HA-KanMX6 ura3-52 leu2_0 MATa</i>                                           | This study      |
| BWP17  | <i>ura3::_imm434/ura3::_imm434 his1::hisG/his1::hisG arg4::hisG/arg4::hisG</i>                   | FGSC (UMKC, MO) |
| yCK307 | <i>sha3::CdHIS1/SHA3 ura3::_imm434/ura3::_imm434 his1::hisG/his1::hisG arg4::hisG/arg4::hisG</i> | This Study      |

---
