# Supplementary material for: The Yeast Sks1p Kinase Signaling Network Regulates Pseudohyphal Growth and Glucose Response
Source: PubMed Central journal article supplement (PMC3945295; doi:10.1371/journal.pgen.1004183), 2014-03-06
Supplement: pgen.1004183.s004.pdf [file pgen.1004183.s004.pdf]

**Table S2.** Plasmids used in this study

| Plasmid       | Description                                                                      | Source                      |
|---------------|----------------------------------------------------------------------------------|-----------------------------|
| pFRE-LacZ     | P <sub>FRE(TEC1)</sub> :: <i>lacZ</i> , <i>URA3</i> , 2 $\mu$ , Amp <sup>r</sup> | Madhani and Fink, 1997      |
| pSKS1-vYFP    | P <sub>SKS1</sub> - <i>SKS1</i> , <i>URA3</i> , Cen, Amp <sup>r</sup>            | Bharuca <i>et al</i> , 2008 |
| pSKS1-KD-vYFP | P <sub>SKS1</sub> - <i>SKS1-K39R</i> , <i>URA3</i> , Cen,<br>Amp <sup>r</sup>    | Bharuca <i>et al</i> , 2008 |
| p426GPD       | P <sub>GPD3</sub> , <i>URA3</i> , 2 $\mu$ , Amp <sup>r</sup>                     | Mumberg <i>et al</i> , 1995 |
| pCK020        | P <sub>ADH1</sub> - <i>SKS1</i> , <i>URA3</i> , 2 $\mu$ , Amp <sup>r</sup>       | This study                  |
