# Supplementary material for: The Yeast Sks1p Kinase Signaling Network Regulates Pseudohyphal Growth and Glucose Response
Source: PubMed Central journal article supplement (PMC3945295; doi:10.1371/journal.pgen.1004183), 2014-03-06
Supplement: pgen.1004183.s005.pdf [file pgen.1004183.s005.pdf]

**Table S3.** Growth curve of *S. cerevisiae* strains in SLAD media

| Yeast strain             | OD <sub>660</sub> per time point |        |        |         |       |         |
|--------------------------|----------------------------------|--------|--------|---------|-------|---------|
|                          | 0 hr                             | 2.5 hr | 5.5 hr | 8.75 hr | 12 hr | 14.5 hr |
| Wild-type                | 0.149                            | 0.373  | 1.130  | 2.199   | 6.870 | 7.410   |
| <i>bud6</i> Δ/Δ          | 0.085                            | 0.199  | 0.646  | 1.643   | 3.100 | 3.830   |
| <i>hxt1</i> Δ/Δ          | 0.124                            | 0.207  | 0.570  | 1.238   | 2.650 | 3.910   |
| <i>itr1</i> Δ/Δ          | 0.143                            | 0.183  | 0.429  | 0.879   | 1.370 | 2.490   |
| <i>lrg1</i> Δ/Δ          | 0.171                            | 0.237  | 0.544  | 1.038   | 3.210 | 3.140   |
| <i>mds3</i> Δ/Δ          | 0.134                            | 0.202  | 0.567  | 1.331   | 2.400 | 3.530   |
| <i>npr3</i> Δ/Δ          | 0.120                            | 0.171  | 0.312  | 0.443   | 1.370 | 2.900   |
| <i>pda1</i> Δ/Δ          | 0.127                            | 0.167  | 0.210  | 0.214   | 0.391 | 0.485   |
| <i>pdr5</i> Δ/Δ          | 0.134                            | 0.167  | 0.397  | 0.606   | 0.736 | 1.069   |
| <i>prb1</i> Δ/Δ          | 0.109                            | 0.177  | 0.314  | 0.531   | 0.728 | 0.841   |
| <i>ptr2</i> Δ/Δ          | 0.114                            | 0.201  | 0.354  | 0.586   | 0.769 | 1.085   |
| <i>rbs1</i> Δ/Δ          | 0.111                            | 0.241  | 0.450  | 0.690   | 0.887 | 1.204   |
| <i>rck2</i> Δ/Δ          | 0.101                            | 0.265  | 0.522  | 0.886   | 1.688 | 1.478   |
| <i>scp160</i> Δ/Δ        | 0.101                            | 0.193  | 0.435  | 0.587   | 0.880 | 1.140   |
| <i>tpo4</i> Δ/Δ          | 0.116                            | 0.190  | 0.395  | 0.523   | 0.780 | 1.006   |
| <i>bud6</i> -S347A       | 0.130                            | 0.160  | 0.379  | 0.652   | 0.979 | 1.178   |
| <i>itr1</i> -S26A        | 0.102                            | 0.170  | 0.488  | 0.827   | 1.301 | 1.750   |
| <i>lrg1</i> -S605A       | 0.118                            | 0.199  | 0.413  | 0.688   | 1.027 | 1.300   |
| <i>npr3</i> -S486A       | 0.109                            | 0.176  | 0.378  | 0.676   | 0.990 | 1.038   |
| <i>pda1</i> -Y309A       | 0.104                            | 0.121  | 0.221  | 0.411   | 0.747 | 1.115   |
| <i>pda1</i> -S313A       | 0.130                            | 0.142  | 0.269  | 0.563   | 0.871 | 1.043   |
| <i>pda1</i> -Y309A-S313A | 0.099                            | 0.158  | 0.335  | 0.611   | 1.026 | 1.385   |
