# Supplementary material for: The Yeast Sks1p Kinase Signaling Network Regulates Pseudohyphal Growth and Glucose Response
Source: PubMed Central journal article supplement (PMC3945295; doi:10.1371/journal.pgen.1004183), 2014-03-06
Supplement: pgen.1004183.s006.pdf [file pgen.1004183.s006.pdf]

**Table S4.** Growth curve of *S. cerevisiae* strains in SLALD media

| Yeast strain            | OD <sub>660</sub> per time point |        |        |         |       |         |
|-------------------------|----------------------------------|--------|--------|---------|-------|---------|
|                         | 0 hr                             | 2.5 hr | 5.5 hr | 8.75 hr | 12 hr | 14.5 hr |
| Wild-type               | 0.138                            | 0.348  | 0.985  | 1.340   | 4.000 | 3.340   |
| <i>bud6</i> Δ/Δ         | 0.143                            | 0.155  | 0.552  | 1.185   | 2.090 | 2.520   |
| <i>hxt1</i> Δ/Δ         | 0.120                            | 0.232  | 0.559  | 0.951   | 1.730 | 1.730   |
| <i>itr1</i> Δ/Δ         | 0.109                            | 0.208  | 0.438  | 0.645   | 1.486 | 1.970   |
| <i>lrg1</i> Δ/Δ         | 0.124                            | 0.173  | 0.447  | 0.710   | 1.071 | 1.200   |
| <i>mds3</i> Δ/Δ         | 0.101                            | 0.206  | 0.542  | 0.888   | 1.853 | 2.610   |
| <i>npr3</i> Δ/Δ         | 0.135                            | 0.159  | 0.284  | 0.408   | 0.734 | 1.100   |
| <i>pda1</i> Δ/Δ         | 0.097                            | 0.136  | 0.185  | 0.236   | 0.294 | 0.346   |
| <i>pdr5</i> Δ/Δ         | 0.093                            | 0.198  | 0.383  | 0.560   | 0.620 | 0.894   |
| <i>prb1</i> Δ/Δ         | 0.107                            | 0.203  | 0.397  | 0.569   | 0.687 | 0.800   |
| <i>ptr2</i> Δ/Δ         | 0.095                            | 0.158  | 0.382  | 0.554   | 0.699 | 0.767   |
| <i>rbs1</i> Δ/Δ         | 0.075                            | 0.215  | 0.459  | 0.595   | 0.719 | 0.984   |
| <i>rck2</i> Δ/Δ         | 0.098                            | 0.250  | 0.461  | 0.655   | 0.800 | 1.012   |
| <i>scp160</i> Δ/Δ       | 0.105                            | 0.216  | 0.429  | 0.528   | 0.700 | 0.853   |
| <i>tpo4</i> Δ/Δ         | 0.112                            | 0.173  | 0.356  | 0.539   | 0.663 | 0.870   |
| <i>bud6-S347A</i>       | 0.130                            | 0.137  | 0.350  | 0.540   | 0.747 | 0.835   |
| <i>itr1-S26A</i>        | 0.117                            | 0.207  | 0.375  | 0.631   | 0.888 | 1.010   |
| <i>lrg1-S605A</i>       | 0.093                            | 0.189  | 0.310  | 0.520   | 0.740 | 0.850   |
| <i>npr3-S486A</i>       | 0.128                            | 0.139  | 0.284  | 0.460   | 0.629 | 0.720   |
| <i>pda1-Y309A</i>       | 0.107                            | 0.117  | 0.178  | 0.256   | 0.302 | 0.352   |
| <i>pda1-S313A</i>       | 0.106                            | 0.161  | 0.252  | 0.431   | 0.607 | 0.740   |
| <i>pda1-Y309A-S313A</i> | 0.103                            | 0.132  | 0.313  | 0.440   | 0.620 | 0.725   |
