# Supplementary material for: The Yeast Sks1p Kinase Signaling Network Regulates Pseudohyphal Growth and Glucose Response
Source: PubMed Central journal article supplement (PMC3945295; doi:10.1371/journal.pgen.1004183), 2014-03-06
Supplement: pgen.1004183.s007.pdf [file pgen.1004183.s007.pdf]

**Table S5.** Growth curve of *S. cerevisiae* strains in SC media

| Yeast strain            | OD <sub>660</sub> per time point |        |        |         |        |         |
|-------------------------|----------------------------------|--------|--------|---------|--------|---------|
|                         | 0 hr                             | 2.5 hr | 5.5 hr | 8.75 hr | 12 hr  | 14.5 hr |
| Wild-type               | 0.183                            | 0.366  | 1.365  | 3.015   | 10.050 | 13.680  |
| <i>bud6</i> Δ/Δ         | 0.061                            | 0.225  | 0.725  | 2.265   | 6.450  | 11.025  |
| <i>hxt1</i> Δ/Δ         | 0.138                            | 0.235  | 0.742  | 2.195   | 13.100 | 21.255  |
| <i>itr1</i> Δ/Δ         | 0.137                            | 0.223  | 0.569  | 1.617   | 8.260  | 14.925  |
| <i>lrg1</i> Δ/Δ         | 0.111                            | 0.189  | 0.660  | 1.709   | 12.770 | 21.450  |
| <i>mds3</i> Δ/Δ         | 0.129                            | 0.236  | 0.659  | 2.093   | 11.710 | 16.200  |
| <i>npr3</i> Δ/Δ         | 0.122                            | 0.233  | 0.639  | 1.842   | 12.090 | 19.350  |
| <i>pda1</i> Δ/Δ         | 0.109                            | 0.123  | 0.301  | 0.833   | 2.425  | 5.120   |
| <i>pdr5</i> Δ/Δ         | 0.087                            | 0.156  | 0.358  | 1.602   | 4.105  | 9.440   |
| <i>prb1</i> Δ/Δ         | 0.113                            | 0.151  | 0.378  | 1.526   | 4.030  | 9.140   |
| <i>ptr2</i> Δ/Δ         | 0.111                            | 0.181  | 0.436  | 1.406   | 4.200  | 9.490   |
| <i>rbs1</i> Δ/Δ         | 0.117                            | 0.223  | 0.400  | 1.740   | 4.425  | 9.950   |
| <i>rck2</i> Δ/Δ         | 0.092                            | 0.247  | 0.549  | 2.060   | 5.335  | 9.640   |
| <i>scp160</i> Δ/Δ       | 0.106                            | 0.175  | 0.453  | 1.492   | 4.150  | 8.790   |
| <i>tpo4</i> Δ/Δ         | 0.098                            | 0.160  | 0.364  | 1.520   | 5.340  | 11.280  |
| <i>bud6-S347A</i>       | 0.120                            | 0.213  | 0.542  | 1.729   | 6.960  | 10.440  |
| <i>itr1-S26A</i>        | 0.110                            | 0.266  | 0.637  | 1.961   | 6.150  | 11.950  |
| <i>lrg1-S605A</i>       | 0.128                            | 0.215  | 0.530  | 1.690   | 5.855  | 12.940  |
| <i>npr3-S486A</i>       | 0.103                            | 0.197  | 0.498  | 1.640   | 5.230  | 15.600  |
| <i>pda1-Y309A</i>       | 0.102                            | 0.146  | 0.364  | 1.003   | 2.820  | 7.710   |
| <i>pda1-S313A</i>       | 0.112                            | 0.194  | 0.459  | 1.528   | 4.840  | 11.820  |
| <i>pda1-Y309A-S313A</i> | 0.104                            | 0.204  | 0.537  | 1.694   | 5.400  | 14.400  |
