# Supplementary material for: The Yeast Sks1p Kinase Signaling Network Regulates Pseudohyphal Growth and Glucose Response
Source: PubMed Central journal article supplement (PMC3945295; doi:10.1371/journal.pgen.1004183), 2014-03-06
Supplement: pgen.1004183.s008.pdf [file pgen.1004183.s008.pdf]

**Table S6.** Average growth rates of *S. cerevisiae* strains in SC, SLAD, and SLALD media

|                         | SC media<br>(OD <sub>660</sub> /hr) | SLAD media<br>(OD <sub>660</sub> /hr) | SLALD media<br>(OD <sub>660</sub> /hr) |
|-------------------------|-------------------------------------|---------------------------------------|----------------------------------------|
| Wild-type               | 0.94                                | 0.51                                  | 0.23                                   |
| <i>bud6</i> Δ/Δ         | 0.76                                | 0.26                                  | 0.17                                   |
| <i>hxt1</i> Δ/Δ         | 1.47                                | 0.27                                  | 0.12                                   |
| <i>itr1</i> Δ/Δ         | 1.03                                | 0.17                                  | 0.14                                   |
| <i>lrg1</i> Δ/Δ         | 1.48                                | 0.22                                  | 0.09                                   |
| <i>mds3</i> Δ/Δ         | 1.12                                | 0.24                                  | 0.18                                   |
| <i>npr3</i> Δ/Δ         | 1.33                                | 0.20                                  | 0.08                                   |
| <i>pda1</i> Δ/Δ         | 0.35                                | 0.03                                  | 0.02                                   |
| <i>pdr5</i> Δ/Δ         | 0.65                                | 0.07                                  | 0.06                                   |
| <i>prb1</i> Δ/Δ         | 0.63                                | 0.06                                  | 0.06                                   |
| <i>ptr2</i> Δ/Δ         | 0.65                                | 0.07                                  | 0.05                                   |
| <i>rbs1</i> Δ/Δ         | 0.69                                | 0.08                                  | 0.07                                   |
| <i>rck2</i> Δ/Δ         | 0.66                                | 0.10                                  | 0.07                                   |
| <i>scp160</i> Δ/Δ       | 0.61                                | 0.08                                  | 0.06                                   |
| <i>tpo4</i> Δ/Δ         | 0.78                                | 0.07                                  | 0.06                                   |
| <i>bud6-S347A</i>       | 0.72                                | 0.08                                  | 0.06                                   |
| <i>itr1-S26A</i>        | 0.82                                | 0.12                                  | 0.07                                   |
| <i>lrg1-S605A</i>       | 0.89                                | 0.09                                  | 0.06                                   |
| <i>npr3-S486A</i>       | 1.08                                | 0.07                                  | 0.05                                   |
| <i>pda1-Y309A</i>       | 0.53                                | 0.08                                  | 0.02                                   |
| <i>pda1-S313A</i>       | 0.82                                | 0.07                                  | 0.05                                   |
| <i>pda1-Y309A-S313A</i> | 0.99                                | 0.10                                  | 0.05                                   |
